# Supplementary material for: Liver transcriptome profile in pigs with extreme phenotypes of intramuscular fatty acid composition
Source: PubMed Central journal article supplement (PMC3478172; doi:10.1186/1471-2164-13-547), 2012-10-11
Supplement: 1471-2164-13-547-S3.pdf [file 1471-2164-13-547-S3.pdf]

**H1 (r= 0.72)**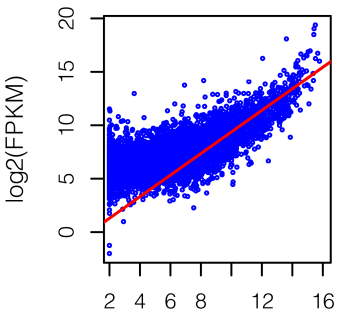**H3 (r= 0.74)**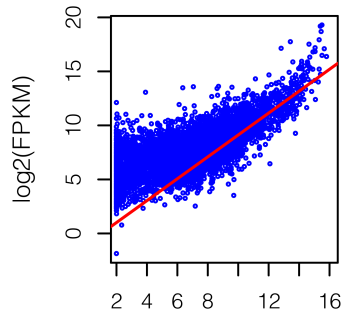**H5 (r= 0.74)**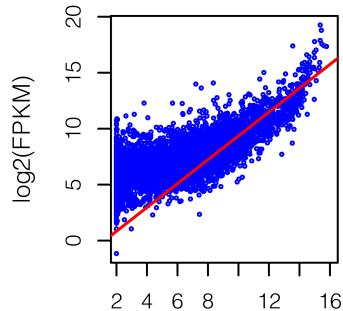**L2 (r= 0.74)**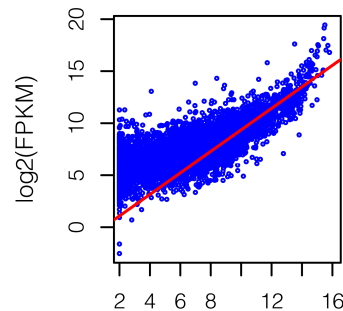**L4 (r= 0.74)**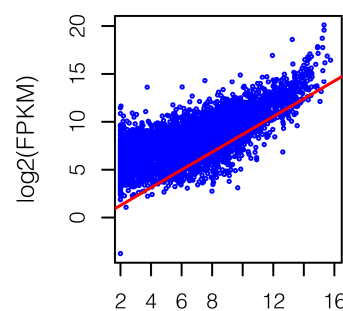**H2 (r= 0.72)**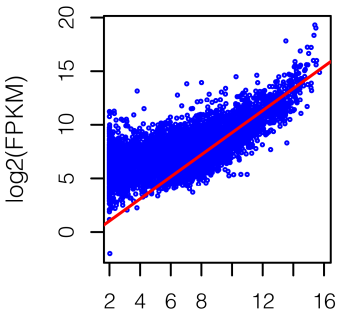**H4 (r= 0.73)**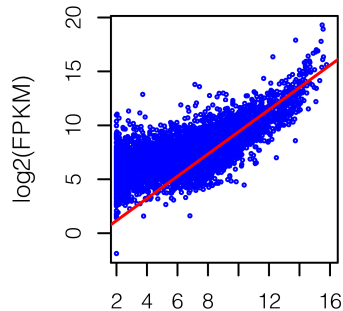**L1 (r= 0.74)**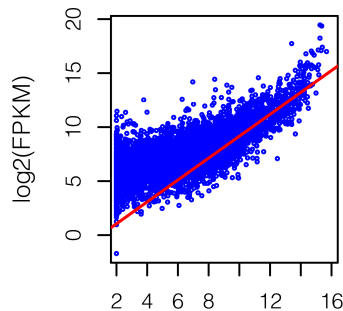**L3 (r= 0.73)**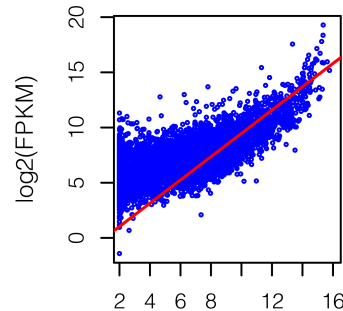**L5 (r= 0.74)**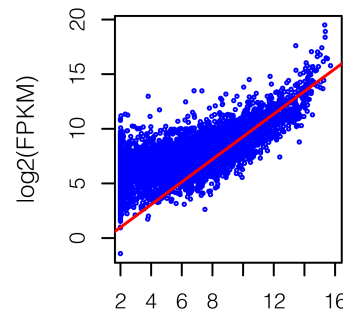 $\log_2(\text{Affymetrix})$  $\log_2(\text{Affymetrix})$  $\log_2(\text{Affymetrix})$  $\log_2(\text{Affymetrix})$  $\log_2(\text{Affymetrix})$
