# Supplementary material for: Liver transcriptome profile in pigs with extreme phenotypes of intramuscular fatty acid composition
Source: PubMed Central journal article supplement (PMC3478172; doi:10.1186/1471-2164-13-547), 2012-10-11
Supplement: 1471-2164-13-547-S5.pdf [file 1471-2164-13-547-S5.pdf]

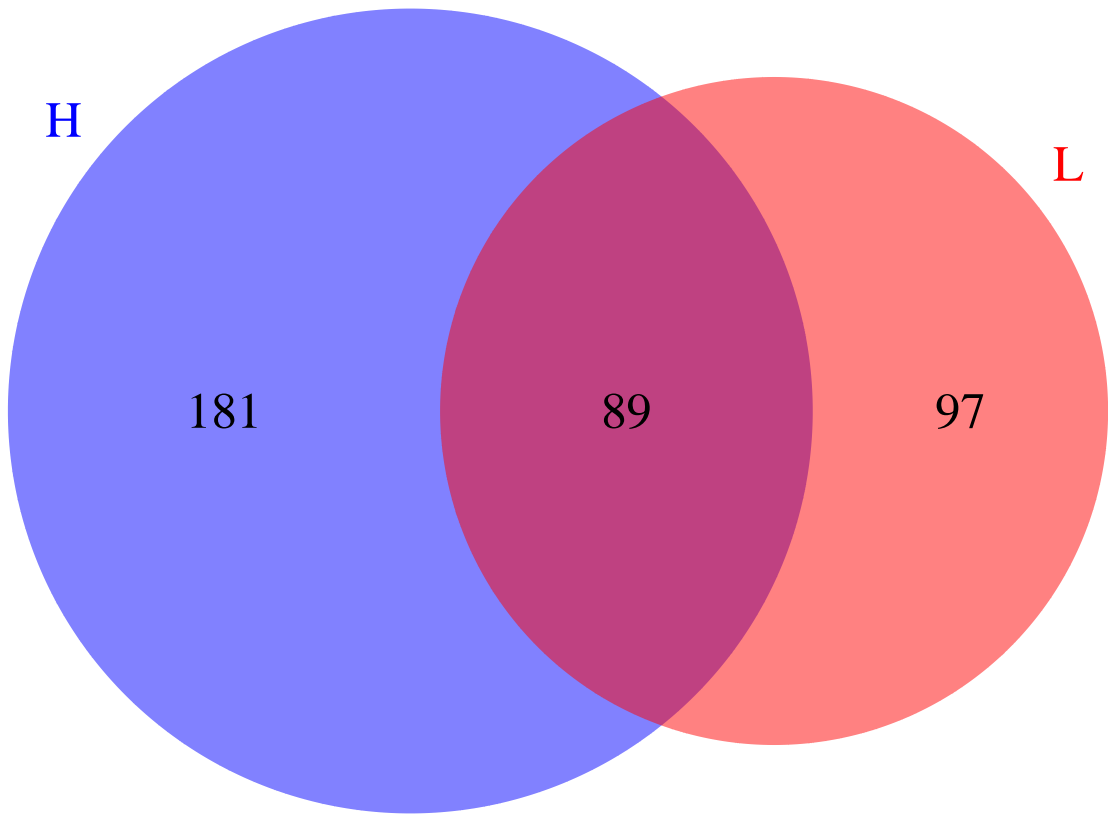

H

L

181

89

97
