# Supplementary material for: Liver transcriptome profile in pigs with extreme phenotypes of intramuscular fatty acid composition
Source: PubMed Central journal article supplement (PMC3478172; doi:10.1186/1471-2164-13-547), 2012-10-11
Supplement: 1471-2164-13-547-S10.pdf [file 1471-2164-13-547-S10.pdf]

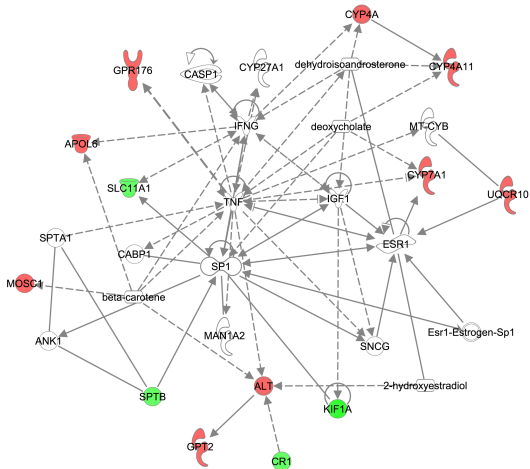

- Complex
- ∩ Cytokine/Growth Factor
- Chemical/Toxicant
- ⌘ Enzyme
- Y G-protein Coupled Receptor
- ⊖ Group/Complex/Other
- ∩ Growth factor
- ⌘ Ligand-dependent Nuclear Receptor
- ⌘ Peptidase
- ⌘ Transcription Regulator
- ⌘ Transporter
- Unknown
- Direct Relationship
- Indirect Relationship
