# Supplementary material for: Liver transcriptome profile in pigs with extreme phenotypes of intramuscular fatty acid composition
Source: PubMed Central journal article supplement (PMC3478172; doi:10.1186/1471-2164-13-547), 2012-10-11
Supplement: 1471-2164-13-547-S11.pdf [file 1471-2164-13-547-S11.pdf]

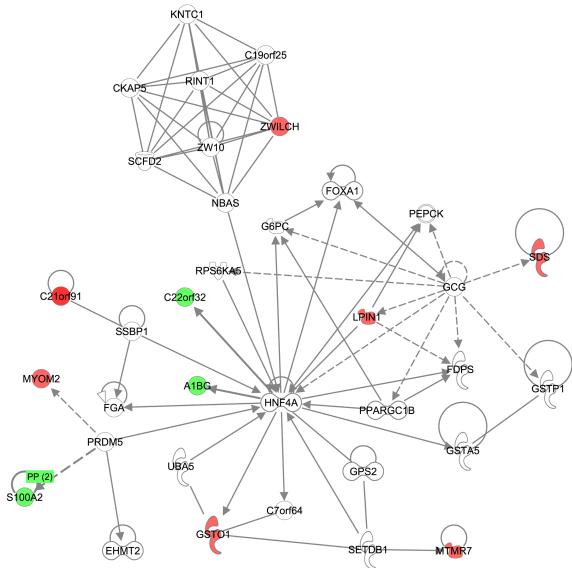

Enzyme

Phosphatase

Unknown

Group/Complex/Other

Transcription Regulator

Direct Relationship

Kinase

Transporter

Indirect Relationship
